1 **Bacterial strain displacement in inflammatory bowel diseases after**  
2 **fecal microbiota transplantation**

3

4 Manli Zou<sup>1,2\*</sup>, Zhuye Jie<sup>2,3,4\*</sup>, Bota Cui<sup>5</sup>, Honggang Wang<sup>5</sup>, Qiang Feng<sup>2,3,6,7,8</sup>, Yuanqiang Zou<sup>2,3</sup>,

5 Xiuqing Zhang<sup>1</sup>, Huanming Yang<sup>2,9</sup>, Jian Wang<sup>2,9</sup>, Faming Zhang<sup>†5</sup>, Huijue Jia<sup>†2,3,4,11</sup>

6 1. BGI Education Center, University of Chinese Academy of Sciences, Shenzhen 518083

7 China;

8 2. BGI-Shenzhen, Shenzhen 518083, China;

9 3. China National Genebank, Shenzhen 518083, China;

10 4. Shenzhen Key Laboratory of Human Commensal Microorganisms and Health Research,

11 BGI-Shenzhen, Shenzhen 518083, China;

12 5. Medical Center for Digestive Disease, the Second Affiliated Hospital of Nanjing Medical

13 University, 121 Jiang JiaYuan, Nanjing 210011, China;

14 6. Shenzhen Engineering Laboratory of Detection and Intervention of Human Intestinal

15 Microbiome, Shenzhen 518083, China;

16 7. Department of Biology, Laboratory of Genomics and Molecular Biomedicine, University

17 of Copenhagen, Universitetsparken 13, 2100 Copenhagen, Denmark;

18 8. Present address: Department of Human Microbiome, School of Stomatology, Shandong

19 9. James D. Watson Institute of Genome Sciences, Hangzhou 310058, China;

20 10. Key Lab of Holistic Integrative Enterology, Nanjing Medical University, Nanjing 210011,

21 China.

22 11. Macau University of Science and Technology, Taipa, Macau 999078, China;

23 \*These authors have contributed equally to this study

24 †Corresponding authors: Faming Zhang., [fzhang@njmu.edu.cn](mailto:fzhang@njmu.edu.cn); H.J.,

25 [jiahuijue@genomics.cn](mailto:jiahuijue@genomics.cn);

26

## 27 **Abstract**

28 **BACKGROUND & AIMS:** Fecal microbiota transplantation (FMT) has been proved  
29 to be efficient in treating Clostridium difficile infection disease, yet its efficacy in  
30 treating Inflammatory bowel disease including Crohn's Disease (CD) and Ulcerative  
31 Colitis (UC) at molecular level are blank.

32 **METHODS:** We performed a parallel study of patients with moderate to severe CD  
33 ( Harvey-Bradshaw Index  $\geq 7$  ) and UC (Montreal classification, S2 and S3).  
34 Patients were treated with single FMT (via mid-gut, from healthy donors; n = 15). All  
35 participants had their fecal samples collected and shotgun sequenced before FMT and  
36 during their follow-up visits. The primary outcome was clinical remission and that of  
37 CD is defined as a decrease of Harvey-Bradshaw  $> 3$ , clinical remission of UC is  
38 defined as a decrease of Mayo score  $> 3$ . To describe and quantify the change of gut  
39 microbiota of IBD patients after FMT, we monitored strain populations in 44 fecal  
40 samples. Besides, we built a machine learning model to predict the existence and  
41 abundance of post-FMT patients' species compositions.

42 **RESULTS:** Of all 15 patients, 3 days after FMT treatment, 8 out of 11 CD patients  
43 were relieved, 3 out of 4 UC patients were relieved (Table S1).

44 We observed the transfer of donor strains to recipient was more abundant in UC than

45 in CD patients, persisting the follow-up time points. Besides, same-donor recipient  
46 differs in the degree of microbiota transfer. Furthermore, through building random  
47 forest classification and regression model, results showed that both the presence and  
48 abundance of some post-FMT patients' species were predicable, indicating a  
49 possibility of precision engineering of the recipients' gut microbiota under the FMT  
50 treatment.

51 **CONCLUSIONS:** FMT treatment efficiency differed in CD and UC patients and  
52 post-FMT patients' mOTU composition was predictable in our data set.

53

54 **KEYWORDS** :shotgun metagenomics; fecal microbial transplantation; Inflammatory  
55 bowel disease; strain-level analysis

56

## 57 **Introduction**

58 Fecal microbiota transplantation (FMT) is to transfer donor fecal suspension into a  
59 patient's gastrointestinal tract aiming at improving the recipient's gut microbial  
60 composition and confer a health benefit. Most of its prior applications were related to  
61 *Clostridium difficile*-associated disease (1). Recent years, FMT has been considered  
62 for Inflammatory bowel disease (IBD) treatment. The two main forms of IBD are CD  
63 and UC, which shares many clinical, epidemiologic, and immunologic features. In  
64 previous studies, gut dysbiosis has been well described in IBD patients, and UC and  
65 CD were found to be of two distinct subtypes of IBD at the microbial community  
66 level (2). However, while several studies have made progress to reveal the

67 composition and temporal stability of UC patients' microbiota after FMT (3,4,5), the  
68 same kind of investigations were lacking on CD patients. There were only a few case  
69 reports of CD patients treating with FMT (6,7,8).

70 Nowadays, in exploring the mechanism of FMT treatment, methods to track the  
71 bacteria engraftment from donor to recipient have come to at the strain level which  
72 followed the principle that strain-level differences had functional and clinically  
73 relevant consequences (9,10). In addition, towards the end of precision engineering, A  
74 recent study used machine learning methods to quantitatively model bacterial  
75 engraftment in diverse metabolic syndrome human host and examined a series of  
76 factors that might promote the engraftment of individual strains (10). Combining  
77 these two state-of-art insights in investigating the differences and principles of  
78 bacterial engraftment among patients who under FMT treatment, we tended to  
79 uncover such rules in 15 IBD patients.

80 In our study, Shannon index of all samples were measured, and the extent of changes  
81 of the gut microbiome population structure after FMT were quantified at both species  
82 and strain level. Varied and highly individualized patterns were found even within  
83 patients who shared a donor, implying that personalized treatment may be of necessity.  
84 Besides, we identified some most important factors that contributed to donor bacteria  
85 engraftment and established relationships between post-FMT patients' species and  
86 patients' biochemical indexes. The composition of pre-FMT recipient flora along with  
87 its clinical phenotype made the greatest contribution to donor species transfer and

88 FMT therapeutic effect, implying the possibility of stratifying IBD patients to get  
89 better and more controllable FMT treatment effect.

90

## 91 **Results**

### 92 **Bacteria diversity and abundance change at species level after treatment**

93 In our study, two batches of data were included which corresponding to FMT and  
94 exclusive enteral nutrition (EEN) treatment of IBD respectively. In total, there were  
95 72 fecal samples and for comparison, we separated them into 7 groups: 8 UC samples  
96 before and after FMT, 22 CD samples before and after FMT, 10 healthy people fecal  
97 samples, 28 CD samples before and after EEN.

98 Alpha-diversity was measured by Shannon index, and has been compared within and  
99 among groups (figure 1A). We found Shannon index was significantly lower in all CD  
100 patients than it was in healthy control (EEN CD patients P-value = 0.0021; FMT CD  
101 recipients P-value = 0.0035) while the difference between UC patients and healthy  
102 people were not significant (P-value = 0.57). Additionally, results showed that  
103 Shannon index was not significantly improved after either treatment (p-value > 0.01.),  
104 neither in CD nor in UC patients.

105 In terms of species abundance changes, we found that 3 days after FMT treatment,  
106 there was a universally obtain of *Bacteroides*, a lower level of which in the gut  
107 microbiota is associated with IBD in patients (11). And there were also some highly  
108 individualistic performances such like CD-9 gained an abundant amount of  
109 *Lactobacillus* which is considered to be probiotics while CD-1 had a great decrease in

110 Citrobacter which was considered to be pathogenic bacteria (figure 1B). The amounts  
111 of species each recipient gained from their donor after FMT were showed in figure  
112 S1.

### 113 **Bacterial engraftment evaluation at the species level**

114 To investigate to what extent recipients' microbiome could be altered, we evaluated  
115 both its degree and direction of change after FMT. For clear clarification of the origins  
116 of post-FMT patients' microbiome, we divided their microbiome composition into  
117 four parts: donor-specific species, recipient-specific species, donor- and recipient-  
118 specific species (common species), and newly species. Results showed that microbial  
119 communities underwent large compositional changes after FMT and changes  
120 maintained throughout the follow-up time visits (figure 1B).

121 On average, 29.4% of the mOTUs came from the donor ( $n = 11$ ,  $SD = 14.4\%$ ) in CD  
122 patients, while 28.2% of the mOTUs came from the donor ( $n = 4$ ,  $SD = 20\%$ ) in UC  
123 patients. Species gained from donor in both types of IBD were not significantly  
124 differed ( $p = 0.89$ ). Our results were very similar to previous study (35% of the  
125 mg-OTUs in the donor ( $n = 436$ ,  $SD = 27\%$ ) (9). As for EEN treatment, on average,  
126 48.6% of the mOTUs were newly gained ( $n = 14$ ,  $SD = 24.1\%$ ) which instigated more  
127 variation at the species level compared with autologous FMT individuals from *Simone*  
128 *S. Li* paper (9).

129 Aiming at monitoring the direction of changes of IBD patients after FMT, we  
130 measured the distance across donor-recipient pairs using Euclidean distance (Figure  
131 2A). Results varied between different donor-recipient pairs. With only 4 patients have

132 2 follow-up time points, we found that CD-9 and UC-2 tended to be closer to their  
133 donors and further from their pre-FMT status. CD-2 showed a slightly tendency to be  
134 back to its initial status, yet the disturbance can be ignored (from 10.628 to 10.57).  
135 Surprisingly, CD-1 showed an increased distance both from their donor and pre-FMT  
136 status. Though CD-1,2 and UC-2 shared the same donor, the direction of their gut  
137 flora change after FMT varied. Besides, we explored the consistency of the abundance  
138 of mOTUs in the patients before and after FMT (Figure 2B). As expectedly, mOTUs  
139 in post-FMT patients had high correlation with those in the pre-FMT patient (median  
140 cosine similarity of UC patient mOTUs = 0.93, that of CD patients = 0.95). More  
141 importantly, results showed that the mOTUs in the post-FMT patient were perfectly  
142 correlated those in the donor (median cosine similarity of UC patient mOTUs = 0.95,  
143 that of CD patients = 0.91). Therefore, bacterial species in the post-FMT patient are  
144 shaped both by the host and donor.

#### 145 **Bacterial engraftment evaluation at the strain level**

146 To compare the extent of strain-level changes among the study groups, we monitored  
147 those identified SNVs in baseline samples over all available time points. A higher  
148 level of single-site allelic variation in UC FMT recipients was observed compared  
149 with autologous FMT recipients ( $P=0.0056$ ) from a previous paper (9), CD FMT  
150 recipients ( $P=0.070$ ) and EEN treatment ( $P=0.059$ ). Higher level of SNV was also  
151 observed in CD FMT recipients and EEN treatment than that in the autologous FMT  
152 recipients ( $P=0.148$  and  $0.234$ , respectively). And unexpectedly, EEN treatment had

153 equivalent level of single-site allelic variation compared with CD FMT recipients  
154 ( $P=0.829$ ) (figure 3).

155 To investigate whether the increased variation was due to the transfer and  
156 establishment of donor microbiota or not, we followed methods defined in a  
157 previously published paper (9). Across recipients, we observed the transfer of donor  
158 strains (figure 4). Donor-specific SNVs were most highly retained 3 days after FMT  
159 (UC:  $62.8 \pm 25.3\%$  of determinant positions across recipients, CD:  $11.4 \pm 10.3\%$ ) and  
160 were still presented 1 months later (UC: 46.9%, CD:  $19.99 \pm 10.1\%$ ). This contrasted  
161 with much lower rates of variation observed at equivalent time points in autologous  
162 FMT recipients ( $9.5 \pm 1.8\%$ ) (figure S4) and showed that the increased variation in  
163 post-FMT patients resulted from donor strain transfer instead of temporal variability  
164 or abundance variation beyond detection thresholds.

165 Furthermore, marked differences in colonization success were observed between UC  
166 or CD recipients who shared a donor (subjects CD-1,2,3,8, and UC-1,2). 3 days after  
167 treatment, UC-1,2 retained a higher amount of donor-specific SNVs compared with  
168 CD-1,2,3,8 (48.9%, 44.4%, 11.9%, 3.4%, 1.5% and 9.3%, respectively). Extensive  
169 coexistence of donor and recipient strains (CD: in  $44.1 \pm 17.1\%$  of shared species, UC:  
170  $21.3 \pm 14.1\%$ ) were found in all other recipients, which persisted for at least one  
171 months. This suggested that novel strains can colonize in the gut without replacing the  
172 indigenous strain population of the recipient. It appeared that introduced strains were  
173 more likely to establish in a new environment if the species was already present. We  
174 sought to determine the extent of donor and recipient strain coexistence across species



175 and pattern of donor strains establishing alongside indigenous strains of the recipient  
176 was seen.

177 While CD FMT species showed more resistance to introduced strains compared with  
178 UC, durability of donor strains varied widely for most species. Donor strains of  
179 *Bifidobacterium longum*, *Citrobacter sp*, *Bacteroides vulgatus*, *Dorea longicatena*,  
180 *Eubacterium hallii* appeared to dominate recipient strains. In contrast, recipient strains  
181 like *Clostridium scindens*, *Coprococcus comes*, *Burkholderiales bacterium*, *Alistipes*  
182 *putredinis* showed resistance to donor strains (figure 4). What amazed us was that  
183 EET treatment also presented the potential to change the recipient strains. *Bacteroides*  
184 *sp*, *Klebsiella pneumonia* presented newly SNPs up to 40%, while  
185 *Methanobrevibacter smithii* showed resistance to EEN treatment (figure 5).

#### 186 **Construction of a prediction model for post-FMT patients' mOTUs**

187 We subsequently performed random forest analysis (RF analysis) to construct a  
188 classification model to predict the presence and absence of species in post-FMT  
189 patients and a regression model to predict the abundance of those species. Recipients'  
190 and the donors' mOTUs along with their clinical metadata before FMT were used as  
191 predictors to construct our model. As for classification, averaged across all predicted  
192 species, we got area under the curve (AUC) = 74.2%, SD = 16%; for regression  
193 model, we got  $\rho = 0.478$ ,  $P < 2.2e-16$  (figure 6A). Results indicated that for some  
194 species of post-FMT patient both the existence and abundance were predictable.  
195 However, the AUC area is relatively lower than a similar study being conducted by  
196 *Christopher S. Smillie et al. (10)*. Reasons may be that some other factors, such as diet,

197 bacterial species interactions, host genetics were not included in the construction of  
198 our model. (but in their model construction, taxonomy, abundance, clinical metadata,  
199 sequencing depth, Genome statistics, physiology, resource utilization are all included)  
200 The RF analysis assigned a variable importance score to each predictor to indicate  
201 their relative contribution to the model. Among the top 40 important variables we  
202 picked (see in methods part) (figure 6B). IgA score, T-cell and Th.cell.Induced of  
203 recipient were the top three clinical elements. *Streptococcus.anginosus*,  
204 *Bacteroides.plebeius*, *Clostridium.bolteae*, *Streptococcus.thermophilus* and  
205 *X.Ruminococcus..gnavus* were the top five species in the classification model.  
206 *Streptococcus.anginosus* was reported to be associated with colorectal cancer and  
207 *Ruminococcus..gnavus* was ever found to be associated with a certain kind of  
208 immunological rejection. Summarizing all those important variables, we found that  
209 species composition and clinic metadata of recipients took the prominent place. Thus,  
210 we suggested that in practice, people who fit the common healthy standards could be  
211 recruited as donor while patients may need to be stratified for better treatment effect.  
212 Our explanation for the importance of recipient phenotype, to some extent, was that it  
213 could reflect the gut healthy and immune status. To explain the biggest part of  
214 recipient mOTUs, we could assume that the engraftment of new species should have a  
215 competition process with those primitive microbiomes of recipient.

#### 216 **Relationships between mOTU change with clinical indexes change**

217 Of all 15 patients, 3 days after FMT treatment, 8 out of 11 CD patients were relieved,  
218 3 out of 4 UC patients were relieved (table S1). Clinical improvement was defined as

219 decrease of Harvey-Bradshaw Index  $> 3$  for CD, and decrease of Mayo score  $> 3$  for  
220 UC (table S1).

221 To evaluate the diagnostic value of FMT, we built relationships between mOTU  
222 change with clinical indexes change by conducting a three-step procedure. Firstly, we  
223 tested whether the clinical indexed change before and after FMT were significantly  
224 higher than 0 using Student's t-test (figure 7A). Results showed that Mental status  
225 change, appetite change, tenesmus change, stool form change, bloody purulent change,  
226 mucous stool change, defecation change and abdominal pain score change were  
227 significant while all the detected change of Immune factors were not significant such  
228 like CD4.CD8, NK cell, TSC, Th.cell.Induced, B cell. Secondly, we linked the  
229 changes of clinical indices with the changes of relative abundance of recipients'  
230 mOTUs before and after FMT using spearman's correlation (figure 7B). We found  
231 that the defecation change was significantly positively correlated with  
232 *Selenomonas.artemidis* and two other unclassified species, while negatively correlated  
233 with *Enterococcus.casseliflavus* and *Prevotella.bivia*. The change of CD4.CD8. and  
234 Th.cell.Induced both significantly positively with *Streptococcus.sp..C150*. Besides,  
235 the change of CD4.CD8. was significantly positively correlated with  
236 *Streptococcus.infantis*, *Streptococcus.parasanguinis*, *Streptococcus.australis* while  
237 negatively correlated with *Lactobacillus.salivarius* and *Streptococcus.gordonii*. The  
238 change of TSC was significantly positively correlated with the change of  
239 *Bacteroides.fragilis*. Thirdly, we tended to examine the relationships of FMT-induced  
240 changes in biochemical markers with some disease-associated characteristics such as

241 disease duration, patients' age and so on (table S2). Results showed that CD4.CD8  
242 change, Th.cell.Induced change (counted by Flow cytometry) and Abdominal pain  
243 score change were significantly negatively correlated with the start age of IBD disease  
244 ( $p < 0.05$ ). In addition, CD4.CD8. change and Th.cell.Induced change were also  
245 significantly negatively correlated with Patients' age. Disease durance and age were  
246 also discovered to act as important predictors in our random forest classification  
247 model, we thus inferred that it may be profitable to have FMT at an early stage of IBD  
248 and that the younger the patient, the better the treatment effect based on this selected  
249 population.

## 250 **Discussion**

251 Fecal microbiota transplantation has been utilized sporadically for over 50 years and it  
252 is best known as a treatment for recurrent *Clostridium difficile* infection. However,  
253 the mechanism by which it exerts its therapeutic effects have not yet been fully  
254 elucidated.

255 Our results confirmed that CD patients were characterized with reduced diversity, all  
256 15 IBD patients underwent significantly microbiota composition change 3 days after  
257 FMT treatment and most of them showed a relief of clinical symptoms.

258 Both the existence and abundance of some post-FMT gut mOTUs were predictable  
259 and correlated with recipients' and donors' mOTU and clinical indices such as IgM,  
260 IgA and CD4.CD8. The recipient gut microbiome was altered and this phenomenon  
261 could also be observed at the strain level. Our comprehensive survey of the gut  
262 microbiomes of IBD patients after FMT supported the notion that IBD as a group of

263 inflammatory conditions of the colon and small intestine that could be triggered by a  
264 dysbiosis of gut flora and be relieved via an introduction of fecal flora from healthy  
265 people. These findings acted as a basis for future microbiome-based therapeutics and  
266 patient stratification in preclinical and clinical phase of IBD. The identified elements  
267 need to be validated in larger and independent cohorts with better experiments design.  
268 Functional analysis of the species and in vitro characterizations of the strains will be  
269 necessary to verify whether a few of the identified markers are “key species” or “key  
270 strains” for the relief of IBD patients after FMT treatment. With further investigation  
271 of the possible mechanisms of FMT, there will be a great promise for the development  
272 of microbiota-based precision treatments.

273

## 274 **Methods**

### 275 **Patients recruitment and metagenomic sequencing**

276 For FMT analysis, DNA of bacteria and associated metadata were collected from 44  
277 fecal samples of 25 individuals. Descriptions of the trail design, patient selection,  
278 donor screening, sample collection, sample processing and sequencing strategy were  
279 also concisely described in *Cui B et al. (7)* paper. Our data set consisted of 10 samples  
280 from 10 healthy people among which 6 are donors, and 22 samples from 11 FMT  
281 recipients who had one follow-up time points collected at day 0 and day 3 and 12  
282 samples from 4 FMT recipients who had two follow-up time points collected at day 0,  
283 day 3 and either day 7 or day 30. As for EEN analysis, DNA extracted from 28 fecal  
284 samples of 14 CD patients who underwent EEN treatment were from Qing He *et al.*

285 (12) study. Samples were collected at baseline and after 2-week EEN treatment and  
286 standards of recruitment and sequencing strategy were described in that paper.  
287 Additionally, DNA extracted from 25 fecal samples of 5 individuals were obtained  
288 from the *Vrieze et al. (13)* study. Those 25 samples of 5 autologous individuals were  
289 collected at day 0(pre-FMT) and days 2,14,42,84 after FMT.

290 In summary, 34 samples were used in analysis of the allogenic FMT group; 25 for the  
291 autologous; 10 for the healthy group; and 28 for the EEN group.

### 292 **Microbiota taxonomic profiling.**

293 Raw reads were quality controlled by trimming low quality bases and removing  
294 host-related reads using cOMG with default parameters (13).

295 Species level profiling was conducted using m-OTUS.pl to generate the mOTUs  
296 profiles which maps the high quality reads against the m-OTUS.v1.padded database  
297 and outputs metagenomic OUT linkage groups (m-OTUS) generating both taxa  
298 previously identified and those yet to be isolated and characterized, as described by  
299 *Sunagawa S et al. (14)*. For strain-level profiling, high quality reads were mapped to  
300 over 5,000 bacterial species' representative genomes with default parameters using  
301 metaSNV (15).

### 302 **Statistical analyses.**

303 Statistical analyses were performed in R using the packages vegan, Hmcc, pROC, and  
304 randomForest. All statistical tests used were two-sided.

305 alpha-diversity.  $\alpha$ -Diversity was calculated on the basis of the gene profile of each  
306 sample according to the Shannon index which is implemented in vegan.

307 Fecal microbiome derived features and visualization. Firstly, we departed its  
308 composition into 4 parts: donor- and recipient-specific species, newly gained species  
309 and species common to donor and recipient. After quantification of those 4 parts of  
310 patients, we averaged those across CD and UC patients separately. Microbiota  
311 variation between individuals was visualized using Bray-Curtis dissimilarity on the  
312 mOTUs -abundance matrix. And distance between the donor and the recipient after  
313 the transplantation and before and after the transplantation was compared.

314 A construction of the machine learning model. Clinic metadata of both recipient and  
315 donor along with mOTUs of both recipient and donor were used as predictors of our  
316 model to predict the existence and abundance of each mOTU of post-FMT patients.  
317 Firstly, we picked a mtry parameter with the lowest error using rfcv function with  
318 5-folded cross validation. Then we use the randomForest function to do classification  
319 across all mOTUs. In total, we got 123 randomForest models and we computed auc  
320 for each. We chose important variables only from those models which had a good  
321 performance in prediction that means auc was bigger than 0.9. We extracted top 40  
322 variables by ranking both their frequency and their contributions across those well  
323 performed classification models.

324 Correlations between mOTUs change with clinical index change. To investigate  
325 whether there is correlation between the clinical index change and some certain  
326 mOTU change, we used rcorr function in Hmisc package to compute spearman  
327 correlation of each motu-clinical index pair. And we used Benjamini-Hochberg to  
328 adjust p value. After that, we pick those pairs with q-value smaller than 0.05 to draw a

329 network using Cytoscape (*16*).

330

### 331 **Additional files**

332

### 333 **Acknowledgements**

334 We gratefully acknowledge colleagues at the Second Affiliated Hospital of Nanjing  
335 Medical University for sample and metadata collection and colleagues at  
336 BGI-Shenzhen for DNA extraction, library construction, sequencing, and discussions.

337

### 338 **Funding**

339 This work was financially supported by grants from the Macau Technology Developm  
340 ent Fund (102/2016/A3), the Shenzhen Municipal Government of China (JSGG20160  
341 229172752028, JCYJ20160229172757249) and the National Natural Science Foundat  
342 ion of China (Grant No.81670606, 81670495).

343

### 344 **Availability of supporting data**

345 The quality-controlled sequencing reads can be found in the database under the  
346 BioProject number

347

### 348 **Competing interests**

349 The authors declare that they have no competing interests.

350



351 **Consent for publication**

352

353 **REFERENCES AND NOTES :**

354 1 , Kassam Z, Lee C H, Yuan Y, et al. Fecal microbiota transplantation for *Clostridium difficile*

355 infection: systematic review and meta-analysis[J]. *The American journal of gastroenterology*,

356 2013, 108(4): 500.

357 2 , Manichanh C, Borruel N, Casellas F, et al. The gut microbiota in IBD[J]. *Nature Reviews*

358 *Gastroenterology and Hepatology*, 2012, 9(10): 599.

359 3 , Angelberger S, Reinisch W, Makristathis A, et al. Temporal bacterial community dynamics

360 vary among ulcerative colitis patients after fecal microbiota transplantation[J]. *The American*

361 *journal of gastroenterology*, 2013, 108(10): 1620.

362 4 , Moayyedi P, Surette M G, Kim P T, et al. Fecal microbiota transplantation induces remission

363 in patients with active ulcerative colitis in a randomized controlled trial[J]. *Gastroenterology*,

364 2015, 149(1): 102-109. e6.

365 5 , Rossen N G, Fuentes S, van der Spek M J, et al. Findings from a randomized controlled trial

366 of fecal transplantation for patients with ulcerative colitis[J]. *Gastroenterology*, 2015, 149(1):

367 110-118. e4.

368 6 , Gordon H, Harbord M. A patient with severe Crohn's colitis responds to Faecal Microbiota

369 Transplantation[J]. *Journal of Crohn's and Colitis*, 2014, 8(3): 256-257.

370 7 , Cui B, Feng Q, Wang H, et al. Fecal microbiota transplantation through mid-gut for

371 refractory Crohn's disease: Safety, feasibility, and efficacy trial results[J]. *Journal of*

372 *gastroenterology and hepatology*, 2015, 30(1): 51-58.

- 373 8 , Suskind D L, Brittnacher M J, Wahbeh G, et al. Fecal microbial transplant effect on clinical  
374 outcomes and fecal microbiome in active Crohn's disease[J]. *Inflammatory bowel diseases*,  
375 2015, 21(3): 556-563.
- 376 9 , Li S S, Zhu A, Benes V, et al. Durable coexistence of donor and recipient strains after fecal  
377 microbiota transplantation[J]. *Science*, 2016, 352(6285): 586-589.
- 378 10, Smillie C S, Sauk J, Gevers D, et al. Strain tracking reveals the determinants of bacterial  
379 engraftment in the human gut following fecal microbiota transplantation[J]. *Cell host & microbe*,  
380 2018, 23(2): 229-240. e5.
- 381 11, Zhou Y, Zhi F. Lower level of bacteroides in the gut microbiota is associated with  
382 inflammatory bowel disease: a meta-analysis[J]. *BioMed research international*, 2016, 2016.
- 383 12, He Q, Gao Y, Jie Z, et al. Two distinct metacommunities characterize the gut microbiota in  
384 Crohn's disease patients[J]. *Gigascience*, 2017.
- 385 13. Vrieze A, Van Nood E, Holleman F, et al. Transfer of intestinal microbiota from lean donors  
386 increases insulin sensitivity in individuals with metabolic syndrome[J]. *Gastroenterology*, 2012,  
387 143(4): 913-916. e7.
- 388 14. Fang C, Zhong H, Lin Y, et al. Assessment of the cPAS-based BGISEQ-500 platform for  
389 metagenomic sequencing[J]. *GigaScience*, 2017, 7(3): gix133.
- 390 15. Sunagawa S, Mende D R, Zeller G, et al. Metagenomic species profiling using universal  
391 phylogenetic marker genes[J]. *Nature methods*, 2013, 10(12): 1196.
- 392 16 , Costea P I, Munch R, Coelho L P, et al. metaSNV: A tool for metagenomic strain level  
393 analysis[J]. *PloS one*, 2017, 12(7): e0182392.
- 394 17, Shannon P, Markiel A, Ozier O, et al. Cytoscape: a software environment for integrated

395 models of biomolecular interaction networks[J]. Genome research, 2003, 13(11): 2498-2504.

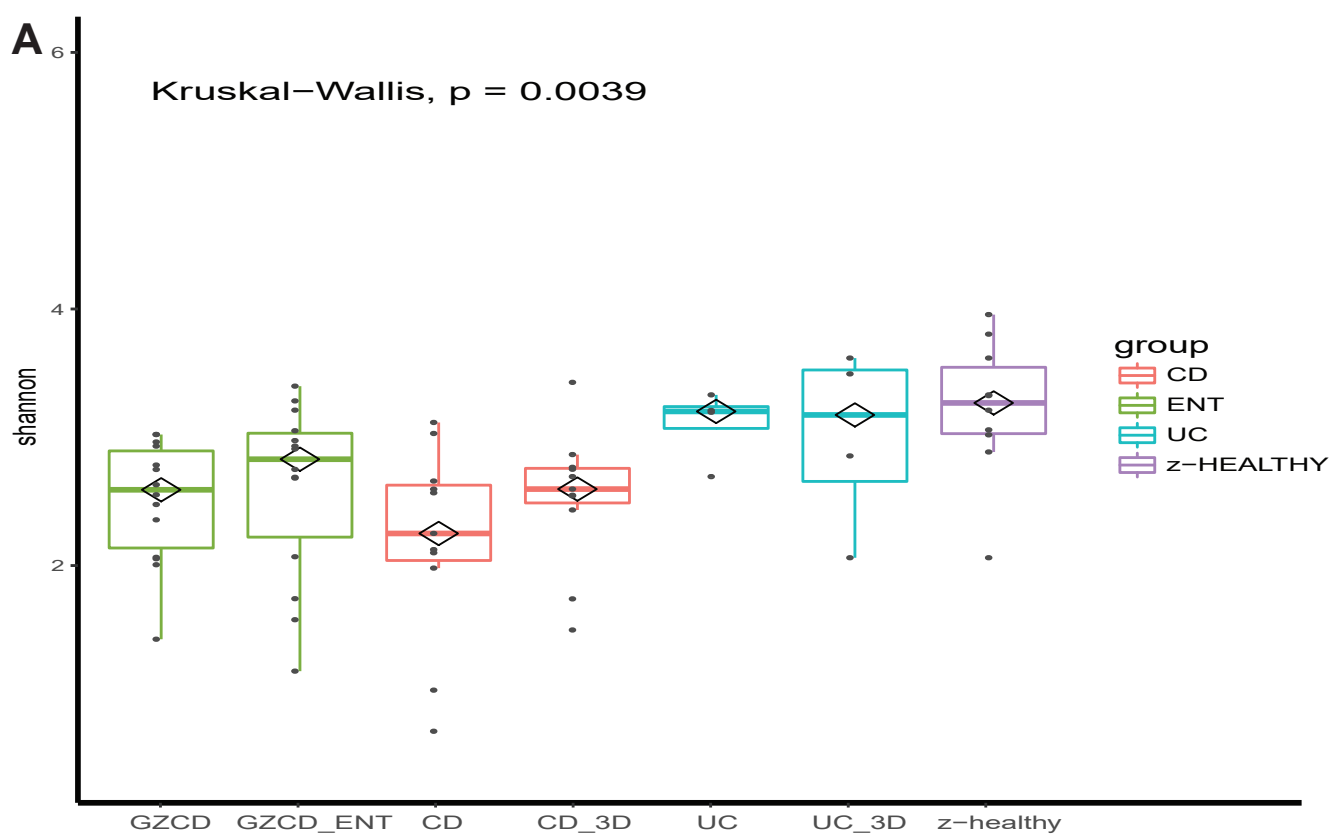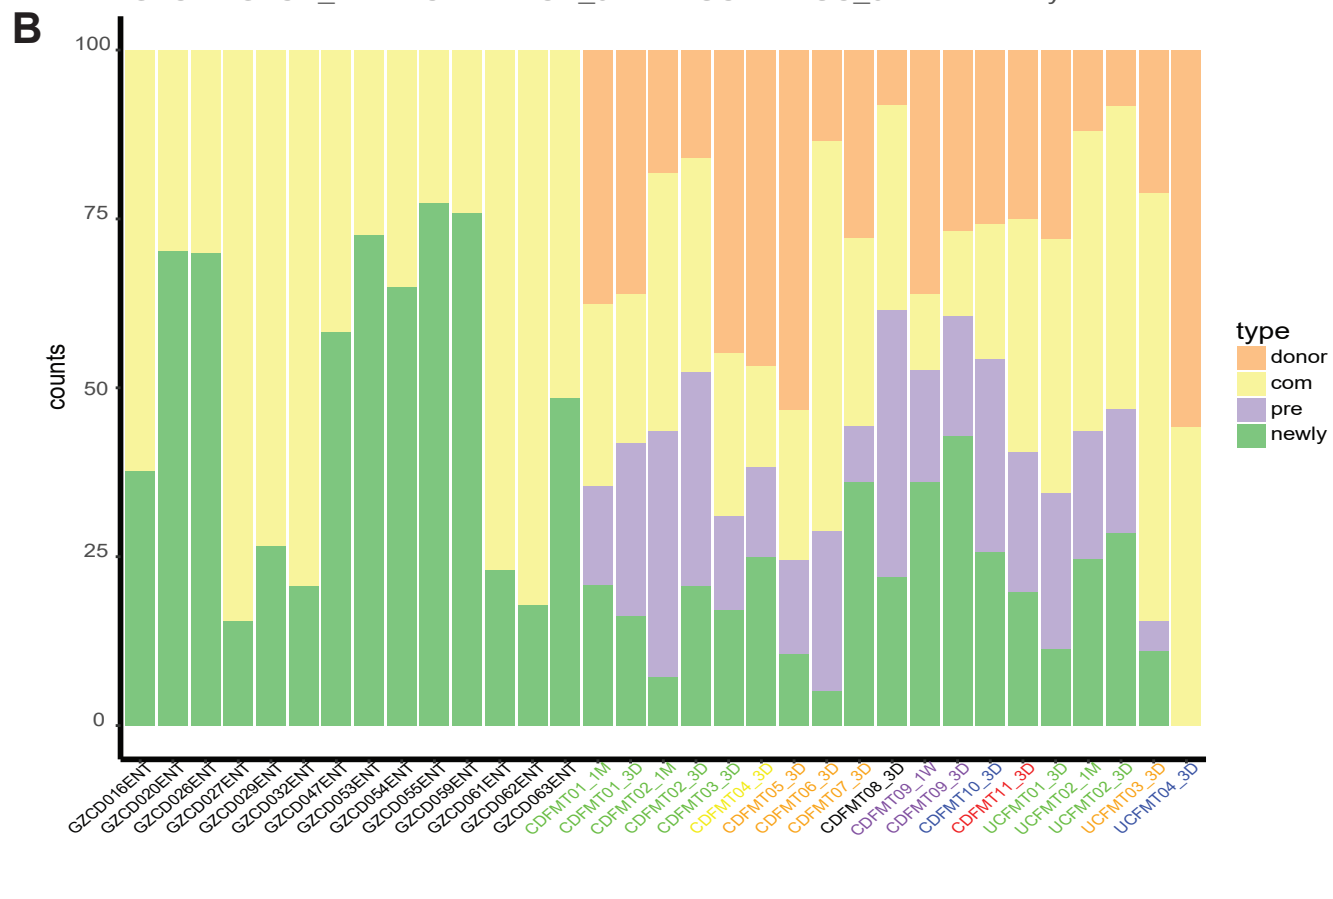

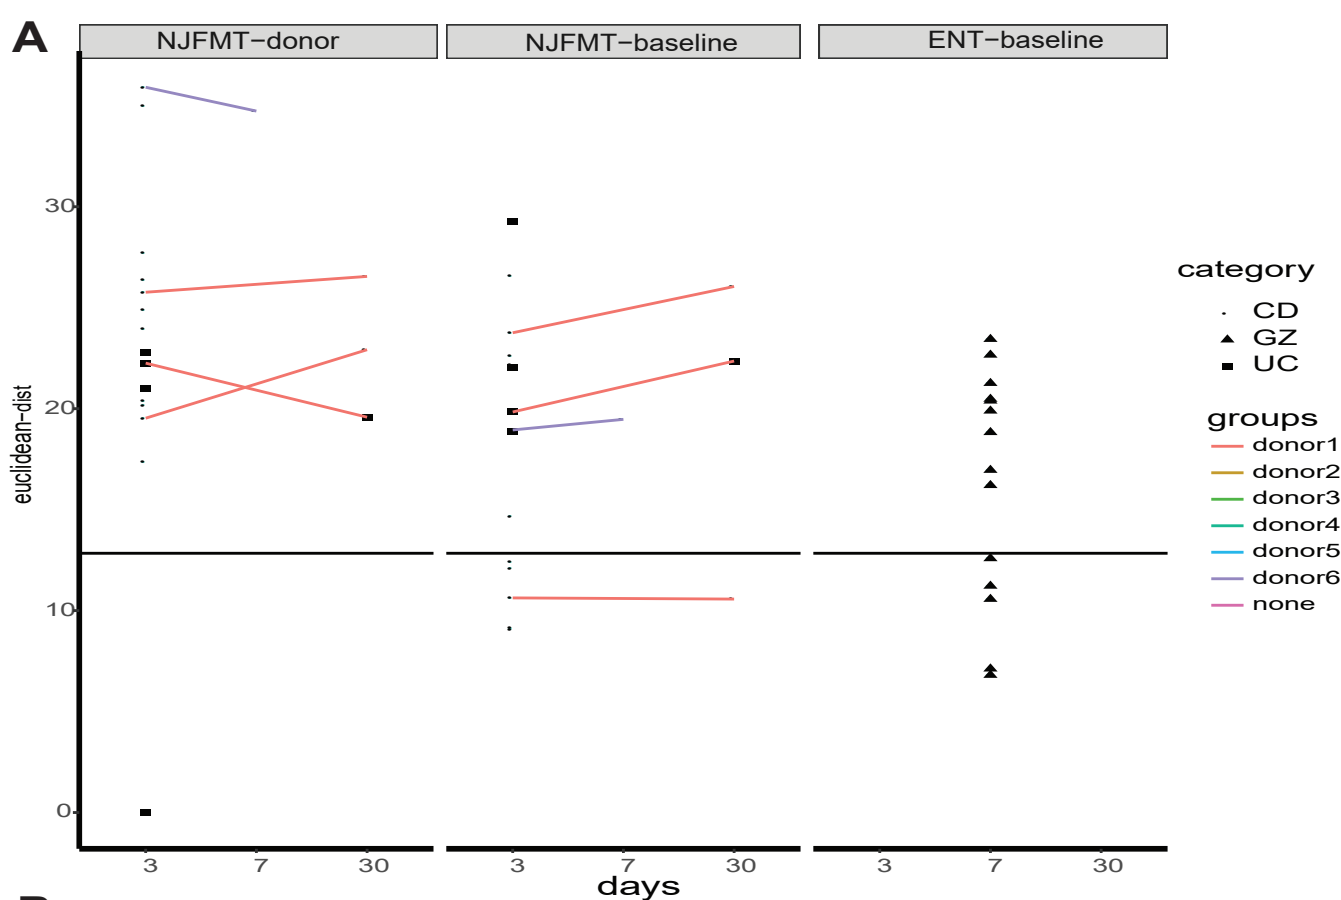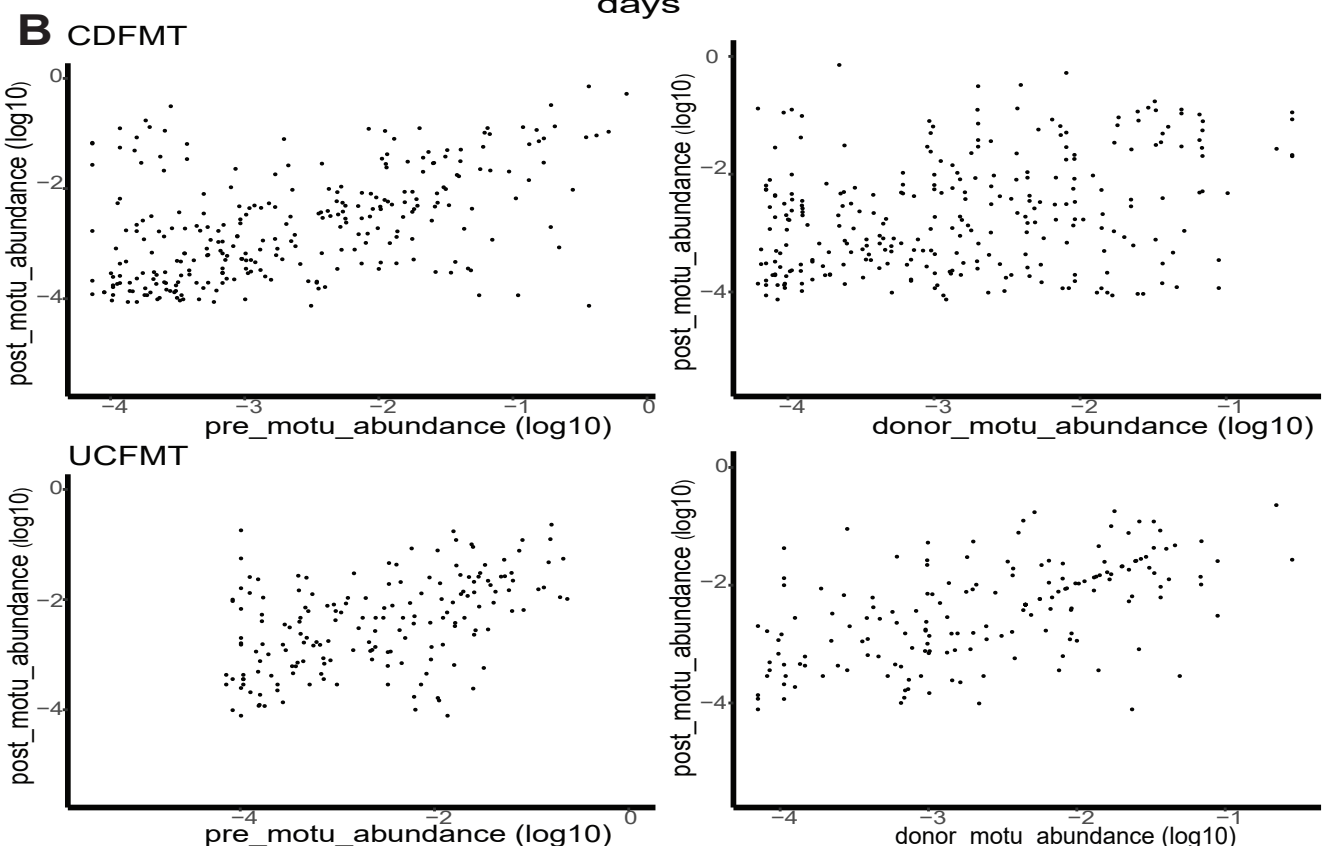

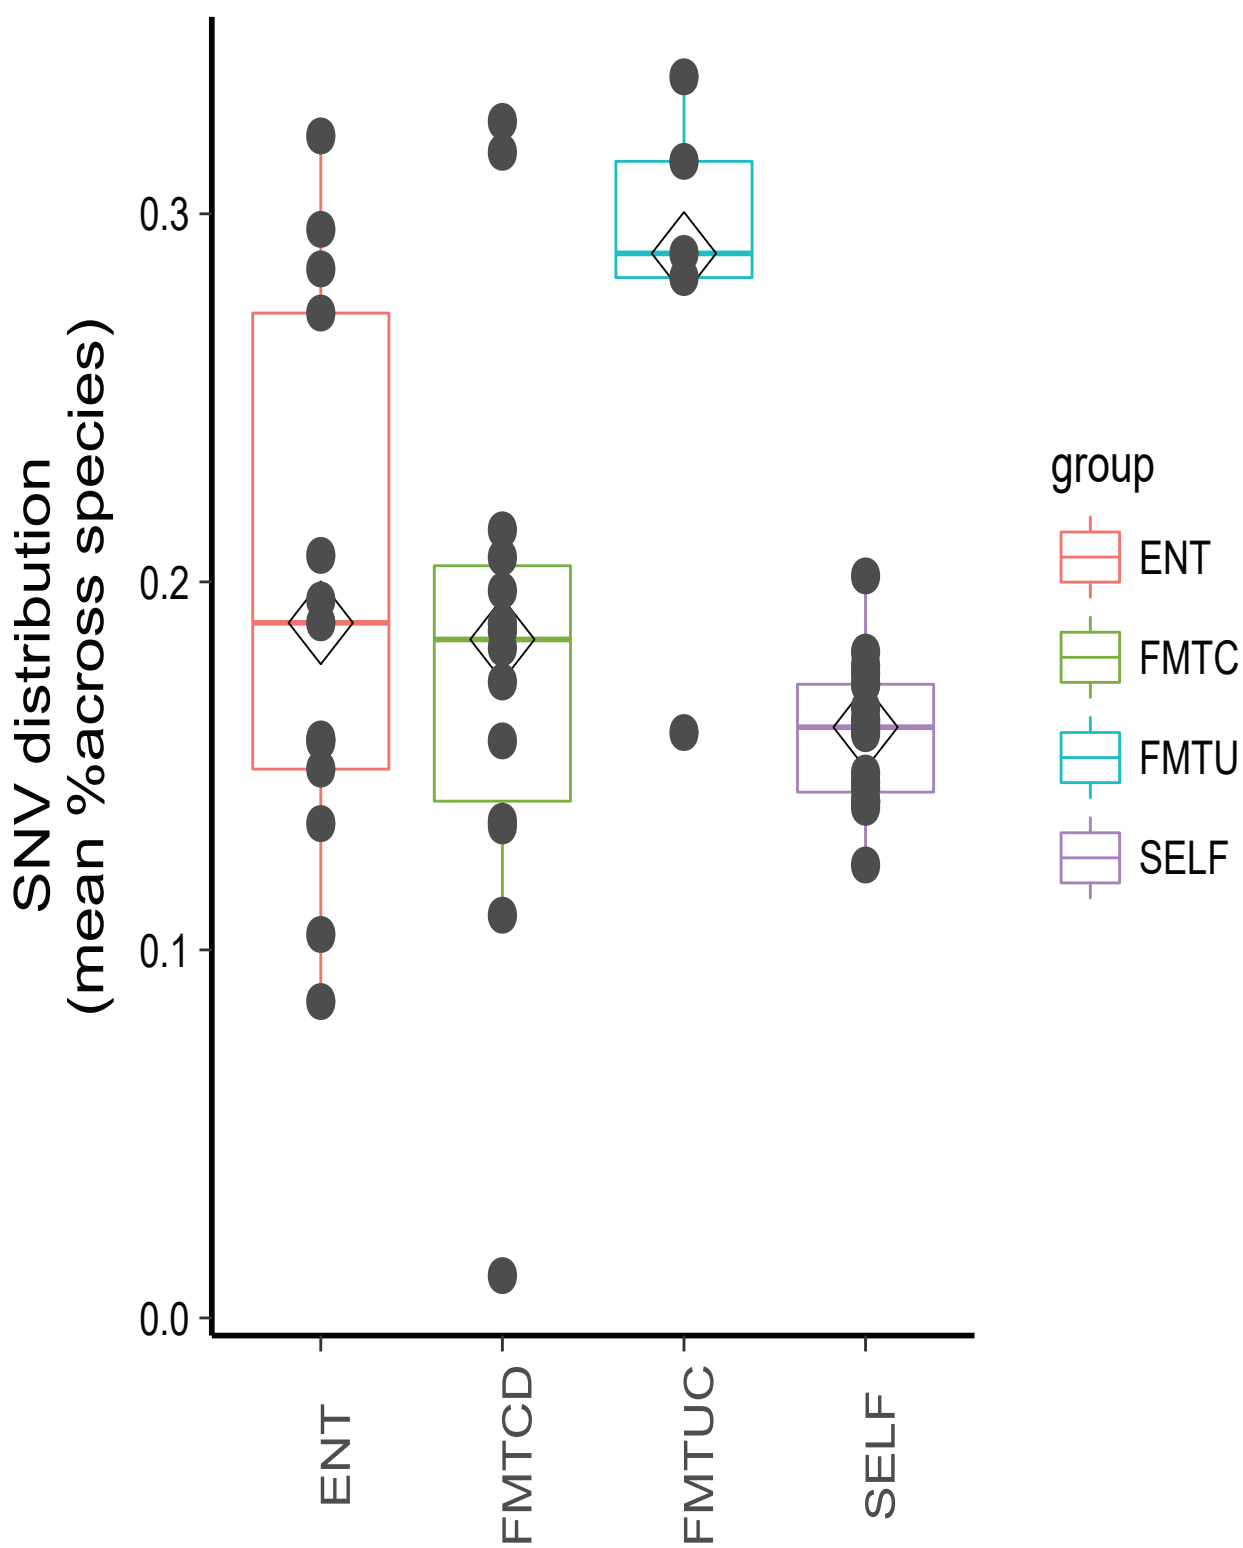

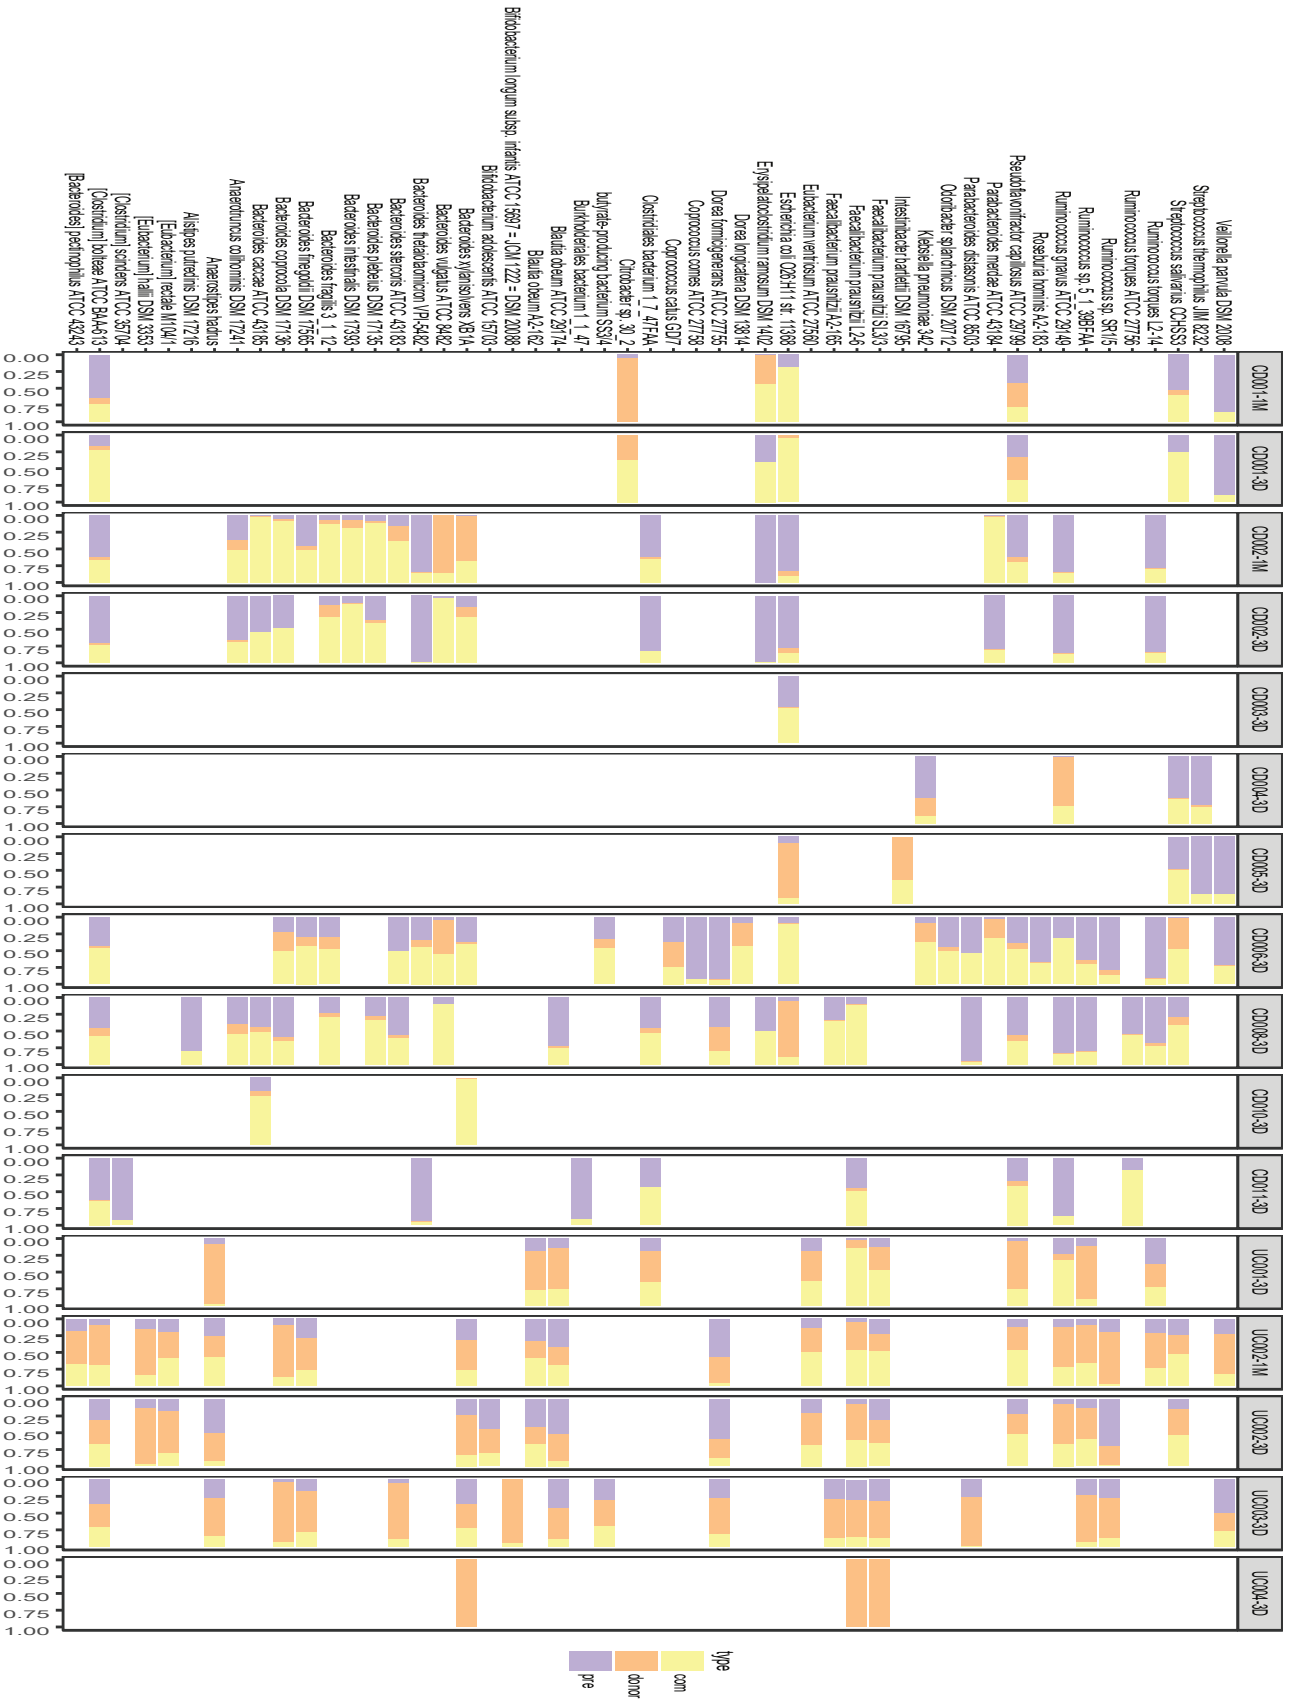





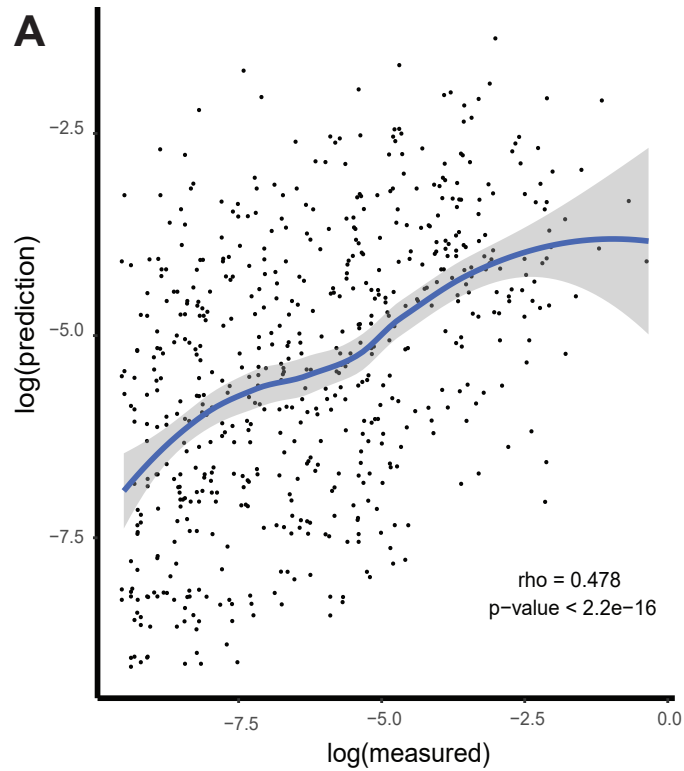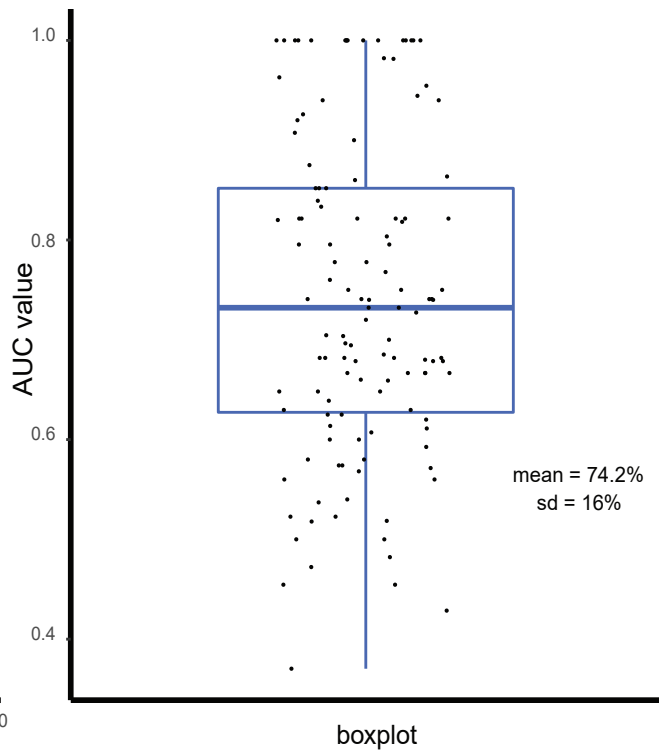

**B**

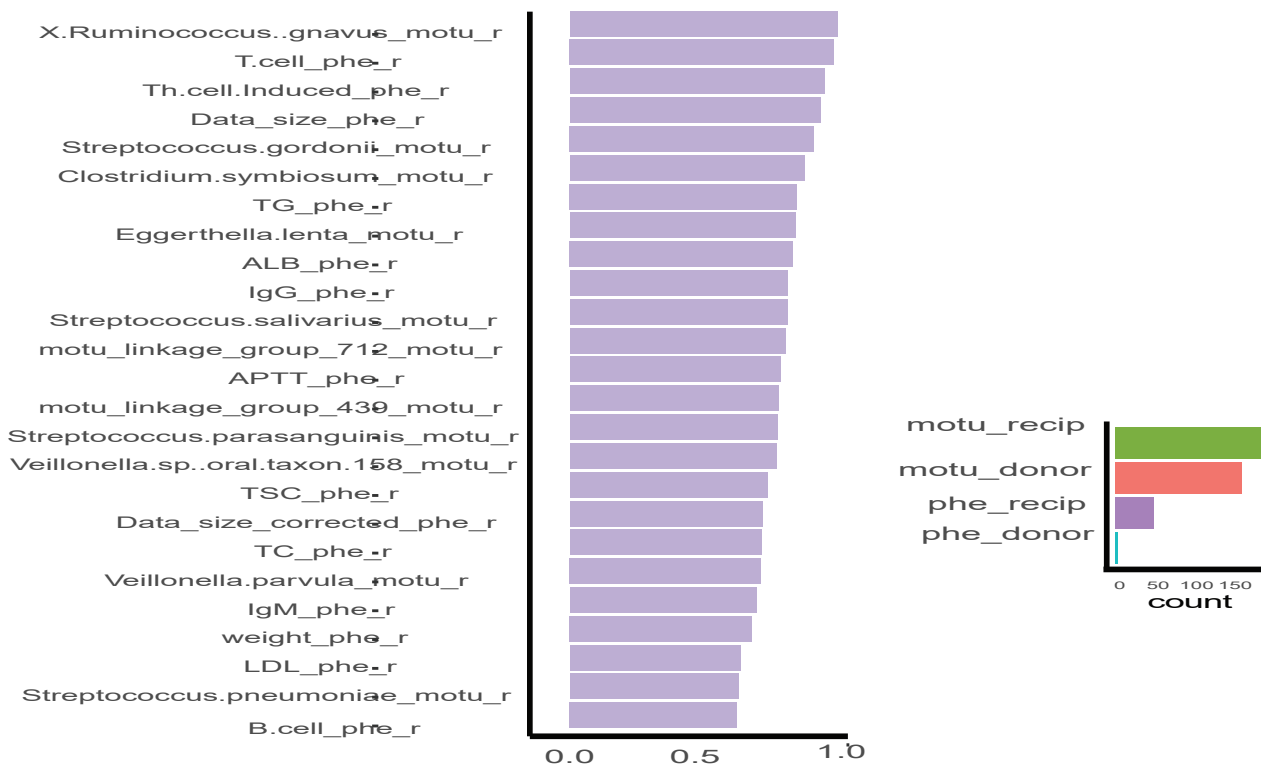

**A**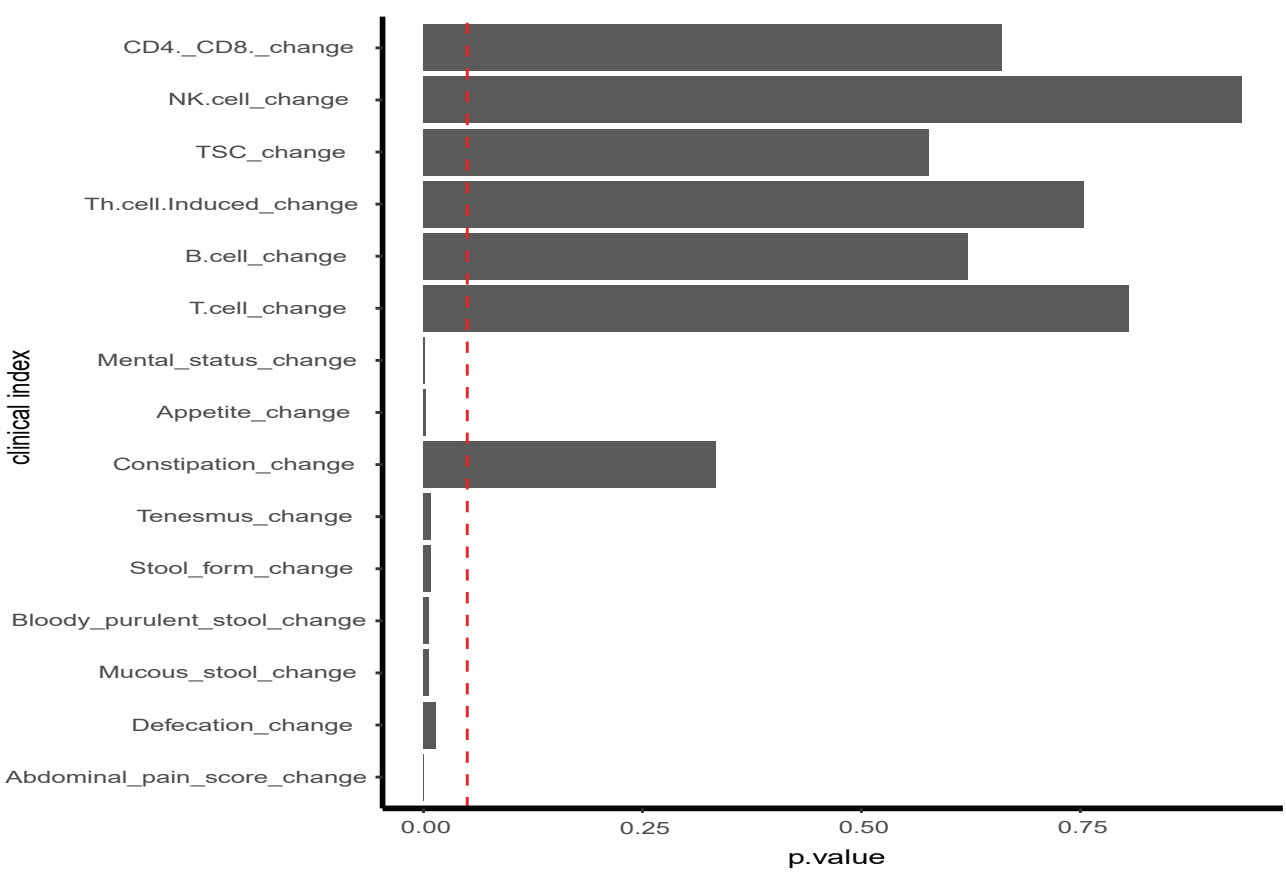**B**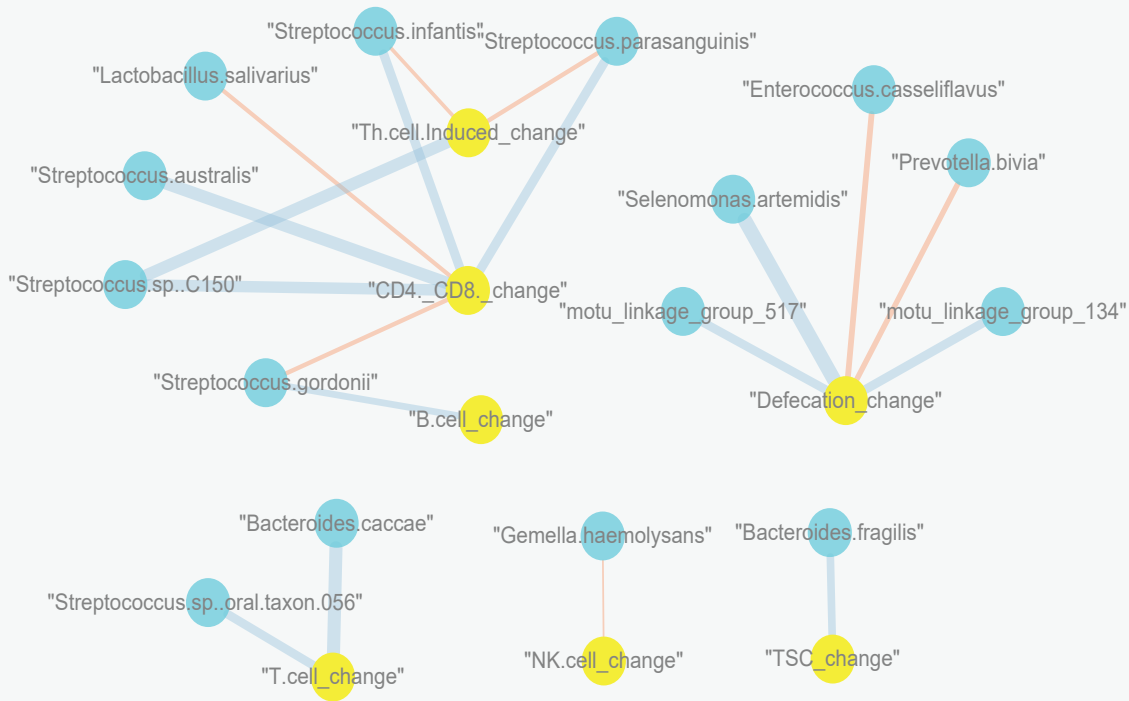

Source: https://www.biorxiv.org/content/10.1101/439687v1.full.pdf
